# Supplementary material for: Bio-elastomer nanocomposites reinforced with surface-modified graphene oxide prepared via in situ coordination polymerization
Source: PubMed Central journal article supplement — RSC Adv. 2020 Oct 5;10(60):36531–8. doi: 10.1039/d0ra07008d (PMC9057045; doi:10.1039/d0ra07008d), 2020-10-05
Supplement: RA-010-D0RA07008D-s001.pdf [file RA-010-D0RA07008D-s001.pdf]

## Supporting Information

### **Bio-elastomer nanocomposites reinforced with surface-modified graphene oxide prepared via *in-situ* coordination polymerization**

Arely Bahena<sup>a</sup>, Ilse Magaña<sup>a</sup>, Héctor Ricardo López González<sup>a</sup>, Rishab Handa<sup>b</sup>, Francisco Javier Enríquez-Medrano<sup>a</sup>, Sugam Kumar<sup>c</sup>, Ricardo Mendoza Carrizales<sup>a</sup>, Salvador Fernandez<sup>a\*</sup>, Luis Valencia<sup>d\*</sup> and Ramón Enrique Díaz de León Gómez<sup>a\*</sup>

<sup>a</sup> *Research Center for Applied Chemistry, Blvd. Enrique Reyna 140, San José de los Cerritos, 25294, Saltillo, Coahuila, Mexico.*

<sup>b</sup> *Experimental Physics, Saarland University, 66123, Saarbrücken, Germany.*

<sup>c</sup> *Solid State Physics Division, Bhabha Atomic Research Centre, Mumbai, 400 085, India.*

<sup>d</sup> *Materials Technology and Chemistry, Alfa Laval Tumba AB, SE-14782 Tumba, Sweden*

\*Correspondence: [luisalexandro.valencialopez@alfalaval.com](mailto:luisalexandro.valencialopez@alfalaval.com); [salvador.fernandez@ciga.edu.mx](mailto:salvador.fernandez@ciga.edu.mx); [ramon.diazdeleon@ciga.edu.mx](mailto:ramon.diazdeleon@ciga.edu.mx)

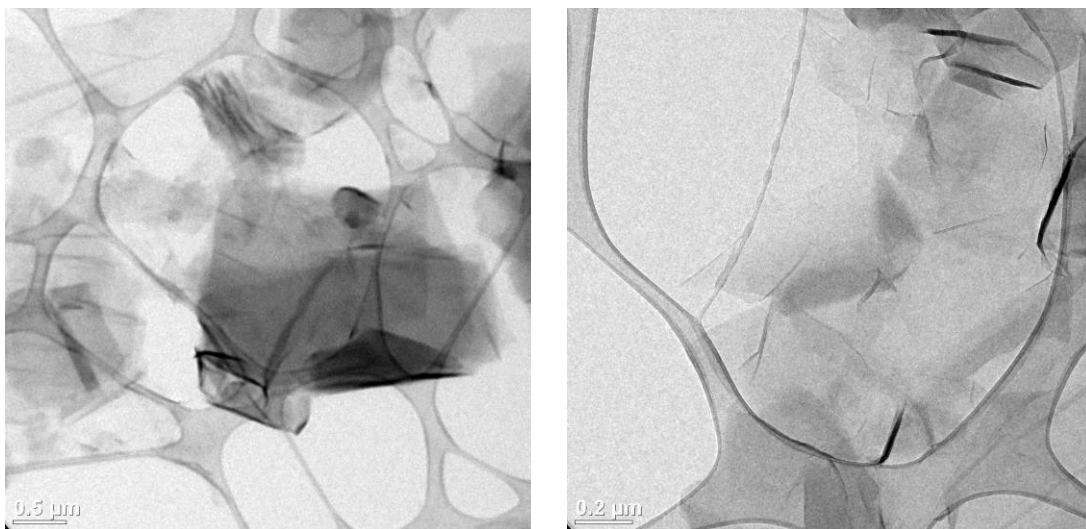

**Figure S1.** Transmission Electron Microscopy (TEM) images of the synthesized GO. The measurements were carried out in a Titan 300 KV, FEI Company, Hillsboro, Oregon, USA) (FEI Company, Titan 300 KV). The samples were dispersed in water via sonication for 30 min and then placed onto the carbon grids.
